# Supplementary material
Source: publisher figshare collection journal article supplement (https://sage.figshare.com/ndownloader/files/13877867)
Supplement: Supplementary file 1 [file 13877867]

## Appendix

|                               |                                                                                                                                                 |
|-------------------------------|-------------------------------------------------------------------------------------------------------------------------------------------------|
| Own Age-Related Communication | When I forget something or have trouble with a task, I often say it is because of my age.                                                       |
|                               | I often hear myself explaining away some event by referring to my age.                                                                          |
|                               | When I talk about what is happening in my life, I frequently mention my age.                                                                    |
|                               | I frequently express the fact that I am optimistic about aging.                                                                                 |
|                               | When I talk about my age or that I am aging, I often sound sad about it.                                                                        |
|                               | When telling stories about myself and my life, I frequently refer to the joys and rewards of being older.                                       |
|                               | I often tease others about their age.                                                                                                           |
|                               | When I send birthday cards or messages, I often poke fun at the person's age.                                                                   |
|                               | I often make jokes about someone's age if they are having problems with some task or other.                                                     |
|                               | When others make jokes about my age, I usually play along.                                                                                      |
|                               | I normally have a comeback for people who make inappropriate comments or tease me about my age.                                                 |
|                               | When people talk to me as if I am just an older person, it bothers me.                                                                          |
|                               | I look for and purchase "antiaging" products (e.g., skin creams, hair restoration products) I read about in magazines and/or see on television. |
|                               | I resent the ads that claim I should work at looking younger.                                                                                   |
|                               | I am skeptical when I see an ad for a product that will help me "recapture my youth."                                                           |
|                               | I have talked with my family and friends about my wishes regarding care as I age.                                                               |
|                               | I have tried to make sure my family is informed about my preferences if they ever need to make health decisions for me.                         |
| Aging Efficacy                | I have talked with my older family members about their wishes regarding care as they age.                                                       |
|                               | I enjoy keeping up with new communication technologies such as social media or new smart phone apps.                                            |
|                               | I find communicating via email, Skype, and other communication technologies frustrating.                                                        |
|                               | I encourage friends and family members to make use of new communication technologies.                                                           |
|                               | I feel that I can deal with any challenges that growing older might bring.                                                                      |
| Successful Aging              | I am confident that if I need to, I will be able to adapt to age-related changes.                                                               |
|                               | I feel able to cope with things that might happen to me as I age.                                                                               |
|                               | I feel fully in control in dealing with my own aging.                                                                                           |
|                               | I don't feel I can really empower (help) others to come to terms with their own aging (reverse-coded).                                          |
|                               | I am not in command as much as I should be about growing older (reverse-coded).                                                                 |
| Successful Aging              | How successfully have you aged up until now?                                                                                                    |
|                               | How well are you aging?                                                                                                                         |
|                               | How do you rate your life these days?                                                                                                           |
|                               | I am happy with the age I am right now.                                                                                                         |
|                               | At my age I feel that life has much to offer.                                                                                                   |
|                               | I'm as happy at this stage in my life as I have been at other points in time.                                                                   |

Note. The same set of 21 items operationalized the parent's age-related communication, with the appropriate noun and pronoun adjustments (e.g., "When my parent forgets something or has trouble with a task, he/she often says it is because of his/her age").

**Table S1.** Fit Indices for Latent Profile Analyses of Participants' and Parents' Age-Related Communication.

| Number of Profiles                                       | Loglikelihood   | AIC             | BIC             | aBIC            | <i>p</i> LMRT | <i>p</i> BLRT    |
|----------------------------------------------------------|-----------------|-----------------|-----------------|-----------------|---------------|------------------|
| Participants' (Children's) Own Age-Related Communication |                 |                 |                 |                 |               |                  |
| 1                                                        | -5490.30        | 11064.61        | 11187.24        | 11054.38        | -             | -                |
| 2                                                        | -5305.83        | 10739.67        | 10926.55        | 10724.08        | < .001        | < .001           |
| <b>3</b>                                                 | <b>-5216.50</b> | <b>10605.00</b> | <b>10856.12</b> | <b>10584.05</b> | <b>.12</b>    | <b>&lt; .001</b> |
| 4                                                        | -5135.09        | 10486.17        | 10801.53        | 10459.86        | .27           | < .001           |
| 5                                                        | -5089.86        | 10439.71        | 10819.31        | 10408.05        | .76           | < .001           |
| Parents' Age-Related Communication                       |                 |                 |                 |                 |               |                  |
| 1                                                        | -5688.14        | 11460.28        | 11582.91        | 11450.04        | -             | -                |
| 2                                                        | -5483.70        | 11095.39        | 11282.27        | 11079.81        | < .001        | < .001           |
| <b>3</b>                                                 | <b>-5372.47</b> | <b>10916.94</b> | <b>11168.06</b> | <b>10896.00</b> | <b>.05</b>    | <b>&lt; .001</b> |
| 4                                                        | -5292.62        | 10801.24        | 11116.60        | 10774.93        | .44           | < .001           |
| 5                                                        | -5213.15        | 10686.31        | 11065.91        | 10654.64        | .41           | < .001           |

*Note.* AIC = Akaike information criterion. BIC = Bayesian information criterion. aBIC = sample-size adjusted BIC. LMRT = Lo-Mendell-Rubin likelihood ratio test. BLRT = Bootstrapped likelihood ratio test. Final models chosen are indicated in bold type. Entropy for the three-profile participant model (.93) and for the three-profile parent model (.97) was high.
